# Supplementary material for: IL6/JAK1/STAT3 Signaling Blockade in Endometrial Cancer Affects the ALDHhi/CD126+ Stem-like Component and Reduces Tumor Burden
Source: Oxford University Press journal article supplement (doi:10.1158/0008-5472.can-14-2498), 2015-07-01
Supplement: 00085472can142498-sup-136806_2_supp_2945641_nn4krs.docx [file 00085472can142498-sup-136806_2_supp_2945641_nn4krs.docx]

**Supplementary Table S1.**

**A.** Clonogenicity analysis of sorted ALDHHI, ALDHLO and bulk cells from the panel of five endometrial cancer cell lines. **B.** Clonogenicity analysis of sorted ALDHHI/CD126HI, ALDHHI/CD126LO, ALDHLO/CD126HI, ALDHLO/CD126LOcells and bulk (control). The results are expressed as number of wells with cellular growth out of the total number of seeded wells (%).

| **A** | |  |  |  | **B** | |  |  |  |  |
| --- | --- | --- | --- | --- | --- | --- | --- | --- | --- | --- |
|  | Sorted population | | |  |  | Sorted population | | | | |
| Cell line | ALDHHI | ALDHLO | Bulk |  | Cell line | ALDHHI CD126HI | ALDHHI CD126LO | ALDHLO CD126HI | ALDHLO CD126LO | Bulk |
| **HEC1B** | 46/64 (72%) | 12/64 (19%) | 25/64 (39%) |  | **HEC1B** | 11/48 (23%) | 8/48 (17%) | 5/48  (10%) | 4/48 (8%) | 6/48 (12.5%) |
| **HEC1A** | 38/64 (59%) | 12/64 (19%) | 22/64 (34%) |  | **HEC1A** | 26/48 (54%) | 13/48 (27%) | 6/48  (12.5%) | 15/48 (31%) | 11/48 (23%) |
| **RL95-2** | 22/64 (34%) | 7/64 (11%) | 10/64 (16%) |  | **RL95-2** | 7/48  (15%) | 2/48 (4%) | 1/48  (2%) | 2/48 (4%) | 8/48 (17%) |
| **IK** | 42/64 (66%) | 13/64 (20%) | 21/64 (33%) |  | **IK** | 6/48 (12.5%) | 3/48 (6%) | 2/48 (4%) | 1/48 (2%) | 4/48  (8%) |
