# Supplementary material for: IL6/JAK1/STAT3 Signaling Blockade in Endometrial Cancer Affects the ALDHhi/CD126+ Stem-like Component and Reduces Tumor Burden
Source: Oxford University Press journal article supplement (doi:10.1158/0008-5472.can-14-2498), 2015-07-01
Supplement: 00085472can142498-sup-136806_2_supp_2960022_nnn4bp.docx [file 00085472can142498-sup-136806_2_supp_2960022_nnn4bp.docx]

**Supplementary Materials and Methods**

*Gene expression analysis*

Expression profiling analysis was performed with the RT2 Profiler Cell Surface Markers PCR Array (Qiagen, Germany) according to the manufacturer’s instructions (<http://www.sabiosciences.com/rt_pcr_product/HTML/PAHS-055Z.html>).
The resulting expression profiles were validated by qPCR, as previously described (1). Expression levels were normalized for the endogenous reference GAPDH gene.

Primers sequences were:

*CD126* forward primer (F-HU-CD126-EMC): 5’-GCTCCACGACTCTGGAAACT-3’;
*CD126* reverse primer (R-HU-CD126-EMC): 5’-GACGACAAAGGCTGTGCTCT-3’.
*GP130* forward primer (F-HU-GP130-EMC): 5’-TGTTGACGTTGCAGACTTGG-3’;
*GP130* reverse primer (R-HU-GP130-EMC): 5’-TTCACTGCAGTTTGTGTGCTAA-3’.

ALDH primers were as previously described (1).

As for the RT-qPCR analysis of EMT genes, primers sequences were:

*GAPDH* forward 5’-GCCAAAAGGGTCATCATCTC-3’;

*GAPDH* reverse: 5’-GGTGCTAAGCAGTTGGTGGT-3’ (2).

*KRT9* forward 5’-GCACTACAGCCACTACTACACGA-3’;

*KRT9* reverse 5’-CTCATGCGCAGAGCCTGTT-3’ (3).

*CDH1* forward 5’-ATTCTGATTCTGCTGCTCTTG-3’;

*CDH1* reverse 5’-AGTAGTCATAGTCCTGGTCTT-3’ (4).

*CHD2* forward 5’-GATGTTGAGGTACAGAATCGT-3’;

*CHD2* reverse 5’-GGTCGGTCTGGATGGCGA-3’ (4).

*VIM* forward 5’-TCTACGAGGAGGAGATGCGG-3’;

*VIM* reverse 5’-GGTCAAGACGTGCCAGAGAC-3’ (5).

*FN1* forward 5’-CCCACCGTCTCAACATGCTTAG-3’;

*FN1* reverse 5’-CTCGGCTTCCTCCATAACAAGTAC-3’ (5).

*SNAI1* forward 5’-CAGACCCACTCAGATGTCAA-3’;

*SNAI1* reverse 5’-CATAGTTAGTCACACCTCGT-3’ (4).

*SNAI2* forward 5’-GGTCAAGAAGCATTTCAAC-3’;

*SNAI2* reverse 5’-GGTAATGTGTGGGTCCGA-3’ (4).

*ZEB1* forward 5’-TTCAGCATCACCAGGCAGTC-3’;

*ZEB1* reverse 5’-GAGTGGAGGAGGCTGAGTAG-3’ (6).

*ZEB2* forward 5’-GCTACGACCATACCCAGGAC-3’;

*ZEB2* reverse 5’-TCTCGCCCGAGTGAAGCC-3’ (6).

*TWIST1* forward 5’-GGGAGTCCGCAGTCTTAC-3’;

*TWIST1* reverse 5’-CCTGTCTCGCTTTCTCTTT-3’ (4).

*TWIST2* forward 5’-GGTCCATGTCCGCCTCCCACTA-3’;

*TWIST2* reverse 5’-CCCCCAAACATAAGACCCAGAAG-3’ (7).

**References.**

1. van der Zee M, Jia Y, Wang Y, Heijmans-Antonissen C, Ewing PC, Franken P*, et al.* Alterations in Wnt-beta-catenin and Pten signalling play distinct roles in endometrial cancer initiation and progression. J Pathol. 2013; 230:48-58.

2. Kheradmand Kia S, Solaimani Kartalaei P, Farahbakhshian E, Pourfarzad F, von Lindern M, Verrijzer CP. EZH2-dependent chromatin looping controls INK4a and INK4b, but not ARF, during human progenitor cell differentiation and cellular senescence. Epigenetics & chromatin. 2009; 2:16.

3. Stathopoulou A, Gizi A, Perraki M, Apostolaki S, Malamos N, Mavroudis D*, et al.* Real-time quantification of CK-19 mRNA-positive cells in peripheral blood of breast cancer patients using the lightcycler system. Clin Cancer Res. 2003; 9:5145-51.

4. Hotz B, Arndt M, Dullat S, Bhargava S, Buhr HJ, Hotz HG. Epithelial to mesenchymal transition: expression of the regulators snail, slug, and twist in pancreatic cancer. Clin Cancer Res. 2007; 13:4769-76.

5. Medici D, Hay ED, Olsen BR. Snail and Slug promote epithelial-mesenchymal transition through beta-catenin-T-cell factor-4-dependent expression of transforming growth factor-beta3. Molecular biology of the cell. 2008; 19:4875-87.

6. Guaita S, Puig I, Franci C, Garrido M, Dominguez D, Batlle E*, et al.* Snail induction of epithelial to mesenchymal transition in tumor cells is accompanied by MUC1 repression and ZEB1 expression. The Journal of biological chemistry. 2002; 277:39209-16.

7. Lee MS, Lowe G, Flanagan S, Kuchler K, Glackin CA. Human Dermo-1 has attributes similar to twist in early bone development. Bone. 2000; 27:591-602.
